# Supplementary material for: Avian Influenza A Virus Polymerase Can Utilize Human ANP32 Proteins To Support cRNA but Not vRNA Synthesis
Source: PubMed Central journal article supplement (PMC9973007; doi:10.1128/mbio.03399-22), 2023-01-16

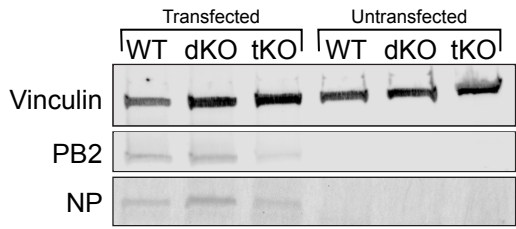

Supplement: mbio.03399-22-s0003.pdf [file mbio.03399-22-s0003.pdf]
